# Supplementary material
Source: PubMed Central journal article supplement (PMC7965608)
Supplement: mmc1.pdf [file mmc1.pdf]

# Chest CT in COVID-19 at the ED: Validation of the COVID-19 Reporting and Data System (CO-RADS) and CT Severity Score

A Prospective, Multicenter, Observational Study

*Arthur W.E. Lieveeld, MD; Kaoutar Azijli, MD; Bernd P. Teunissen, MD; Rutger M. van Haaften, MD; Ruud S. Kootte, MD, PhD; Inge A.H. van den Berk, MD; Sabine F.B. van der Horst, BSc; Carlijn de Gans, MD; Peter M. van de Ven, PhD; and Prabath W.B. Nanayakkara, MD, PhD*

CHEST 2021; 159(3):1126-1135

*Online supplements are not copyedited prior to posting and the author(s) take full responsibility for the accuracy of all data.*

© 2020 AMERICAN COLLEGE OF CHEST PHYSICIANS. Reproduction of this article is prohibited without written permission from the American College of Chest Physicians. See online for more details. DOI: 10.1016/j.chest.2020.11.026

**e-Figure 1: ROC curve CTSS vs Hospital admission**

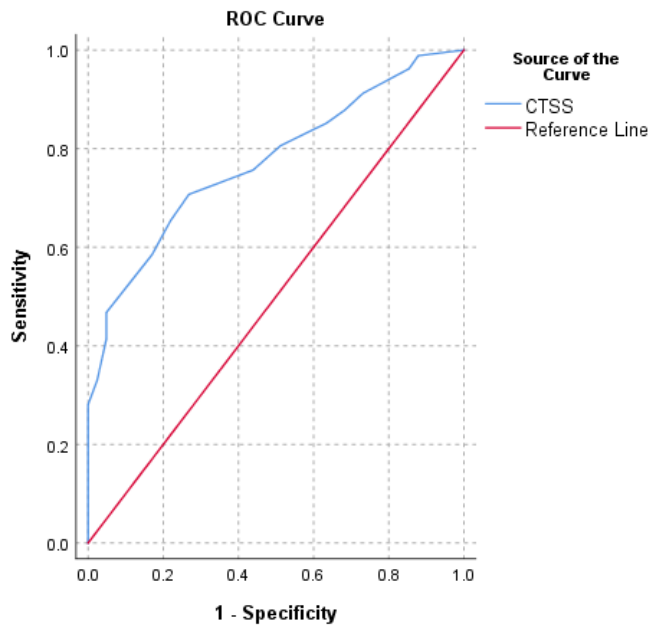

*AUC: 0.773 (CI 0.710-836); ideal cut-off point: 9 (sens: 65.8; spec: 78.0)*

**e-Figure 2: ROC Curve CTSS vs ICU admission**

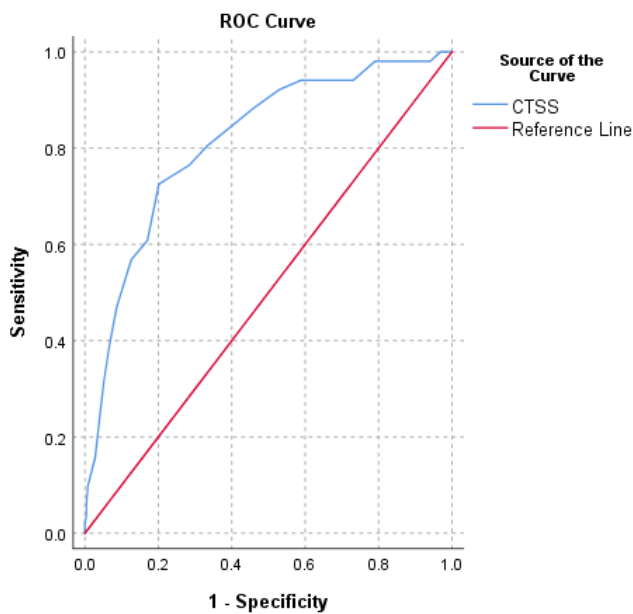

*AUC: 0.81 (CI 0.745-0.876); Ideal cut-off point: 13 (sens: 72.2; spec: 79.6)*

**e-Figure 3: ROC Curve CTSS vs 30-Day mortality**

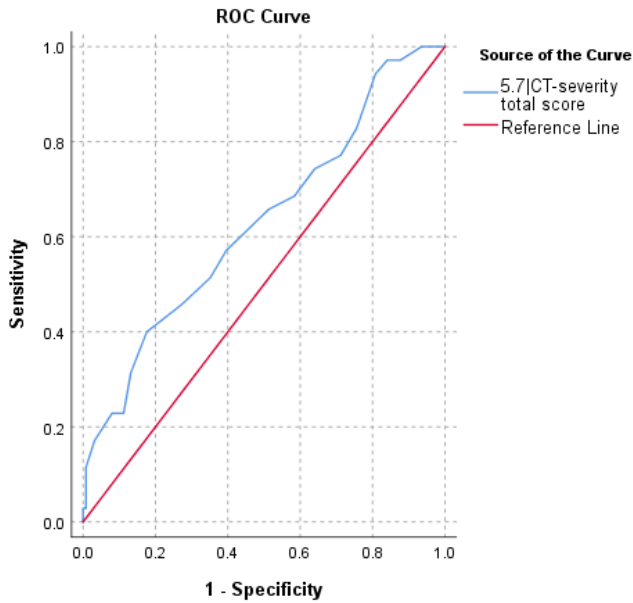

AUC: 0.63 (CI 0.527-0.733); Ideal cut-off point: 13 (sens: 72.2; spec: 79.6)

**e-Figure 4, Grey zone of CTSS vs hospital admission, ICU admission and 30-day mortality**

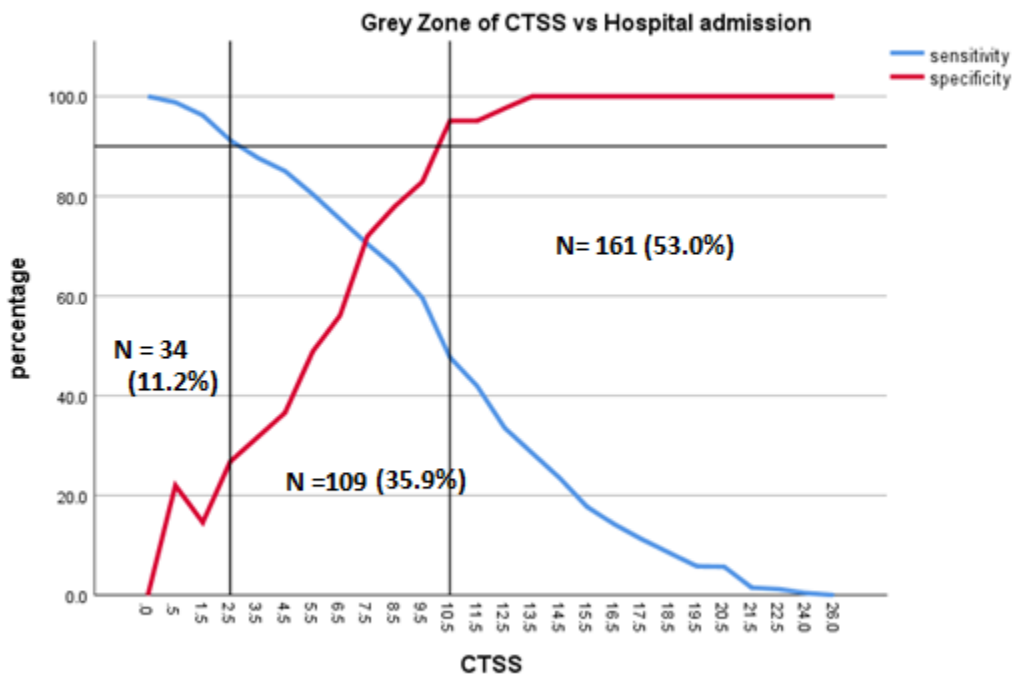

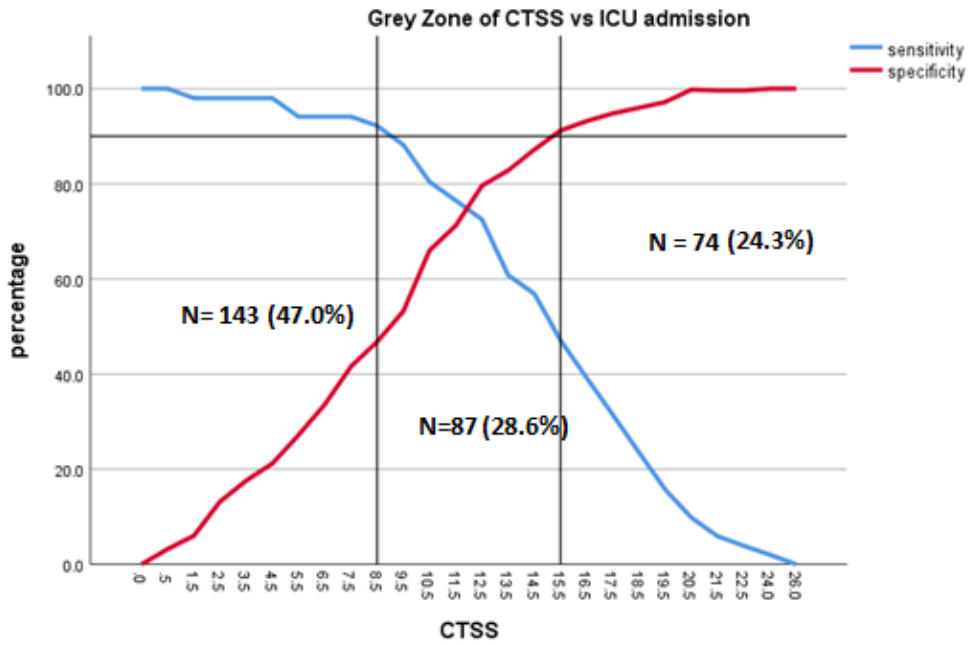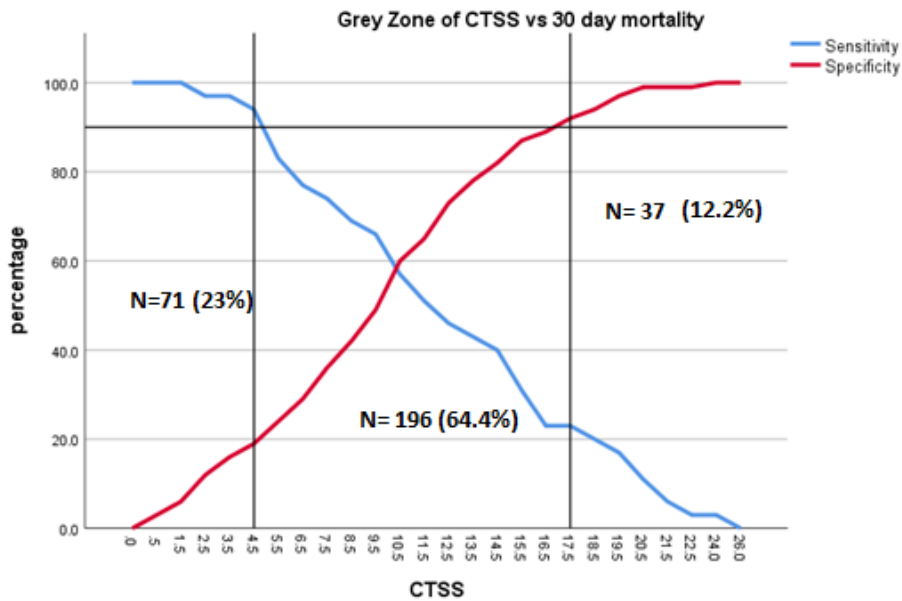

**e-Table 1: CO-RADS scoring system, after Prokop et al, 2020.**

| Score | Level of suspicion | Pulmonary findings                                                                                                                                                                      | Obligatory features                                                                                                                                                                                                                                                                                                                                                                                                                             | Confirmatory patterns | Examples (of alternative diagnoses)                                                                                                                                                                                                  |
|-------|--------------------|-----------------------------------------------------------------------------------------------------------------------------------------------------------------------------------------|-------------------------------------------------------------------------------------------------------------------------------------------------------------------------------------------------------------------------------------------------------------------------------------------------------------------------------------------------------------------------------------------------------------------------------------------------|-----------------------|--------------------------------------------------------------------------------------------------------------------------------------------------------------------------------------------------------------------------------------|
| 0     | Not interpretable  | <ul style="list-style-type: none"> <li>• Incomplete depiction of the lung on CT OR</li> <li>• Technically insufficient for assigning a classification</li> </ul>                        |                                                                                                                                                                                                                                                                                                                                                                                                                                                 |                       | Severe breathing or coughing artifacts                                                                                                                                                                                               |
| 1     | Very low           | Normal chest CT                                                                                                                                                                         | <ul style="list-style-type: none"> <li>• Findings of unequivocal non-infectious etiology</li> <li>• Findings are stable compared to pathology on previous imaging</li> </ul>                                                                                                                                                                                                                                                                    |                       | <ul style="list-style-type: none"> <li>• Emphysema</li> <li>• (Known) interstitial pneumonitis</li> <li>• Nodules</li> <li>• Tumor</li> <li>• Interstitial edema</li> </ul>                                                          |
| 2     | Low                | <ul style="list-style-type: none"> <li>• Findings typical of infectious etiology AND considered not compatible with COVID-19 AND</li> <li>• Absence of features of LEVEL 3-5</li> </ul> | <ul style="list-style-type: none"> <li>• Tree-in-bud sign</li> <li>• Centrilobular nodular pattern</li> <li>• Lobar or segmental consolidation</li> <li>• Cavitation</li> </ul>                                                                                                                                                                                                                                                                 |                       | <ul style="list-style-type: none"> <li>• Bronchitis</li> <li>• Infectious bronchiolitis</li> <li>• Bronchopneumonia</li> <li>• Lobar pneumonia</li> <li>• Pulmonary abscess</li> </ul>                                               |
| 3     | Equivocal / unsure | <ul style="list-style-type: none"> <li>• Equivocal for COVID-19</li> <li>• Overlap with other pathology.</li> <li>• Findings have to be new or increased in magnitude</li> </ul>        | <ul style="list-style-type: none"> <li>• Perihilar ground-glass</li> <li>• Ground-glass together with smooth interlobular septal thickening +/- pleural effusion</li> <li>• Extensive homogeneous ground-glass opacity</li> <li>• Small ground glass opacities, not centrilobular, not located close to the visceral pleura</li> <li>• Consolidation compatible with organizing pneumonia without other typical findings of COVID-19</li> </ul> |                       | <ul style="list-style-type: none"> <li>• Influenza</li> <li>• RSV or other viral pneumonias</li> <li>• Atypical alveolar edema</li> <li>• Pulmonary hemorrhage</li> <li>• Alternative infections combined with SARS-CoV-2</li> </ul> |



# CHEST™ Online Supplement

|   |              |                                                                                                                                                                                                                                                                       |                                                                                                                                                                                                                                                                                     |                                                                                                                                                                                                                                                                                                                                                                                                                                                                                                                                                                                                                                                                                                                                                                                                                                       |  |
|---|--------------|-----------------------------------------------------------------------------------------------------------------------------------------------------------------------------------------------------------------------------------------------------------------------|-------------------------------------------------------------------------------------------------------------------------------------------------------------------------------------------------------------------------------------------------------------------------------------|---------------------------------------------------------------------------------------------------------------------------------------------------------------------------------------------------------------------------------------------------------------------------------------------------------------------------------------------------------------------------------------------------------------------------------------------------------------------------------------------------------------------------------------------------------------------------------------------------------------------------------------------------------------------------------------------------------------------------------------------------------------------------------------------------------------------------------------|--|
| 4 | High         | <ul style="list-style-type: none"> <li>Findings typical for pulmonary involvement of COVID-19 with additional non-typical features seen with other (viral) pneumonia</li> <li>Findings have to be new or increased Findings similar to LEVEL 5 <i>but</i>:</li> </ul> | <ul style="list-style-type: none"> <li>Predominantly no contact with visceral pleura OR</li> <li>Located strictly unilaterally OR</li> <li>Predominant peri-bronchovascular distribution OR</li> <li>Superimposed on severe diffuse pre-existing pulmonary abnormalities</li> </ul> |                                                                                                                                                                                                                                                                                                                                                                                                                                                                                                                                                                                                                                                                                                                                                                                                                                       |  |
| 5 | Very High    | <ul style="list-style-type: none"> <li>Findings typical for pulmonary involvement of COVID-19</li> <li>Findings have to be new OR increased</li> </ul>                                                                                                                | <ul style="list-style-type: none"> <li>Ground-glass with or without consolidations close to visceral pleural surfaces, including fissures AND</li> <li>Bilateral OR multifocal</li> </ul>                                                                                           | <ul style="list-style-type: none"> <li>Ground glass:             <ul style="list-style-type: none"> <li>-<b>Unsharp demarcation</b>, (half) rounded shape.</li> <li>-<b>Sharp demarcation</b>, outlining multiple adjacent secondary pulmonary lobules.                 <ul style="list-style-type: none"> <li>• Crazy paving.</li> <li>• Patterns compatible with <b>organizing pneumonia</b>, such as:                     <ul style="list-style-type: none"> <li>-Reverse halo sign,</li> <li>-Extensive subpleural consolidations with air bronchograms</li> <li>-subpleural curvilinear bands</li> <li>-Ground glass with or without consolidation in an arching, tethered pattern with small connections to the pleura.</li> </ul> </li> </ul> </li> <li>• <b>Thickened vessels</b> within abnormalities</li> </ul> </li> </ul> |  |
| 6 | PCR positive | Any pulmonary findings                                                                                                                                                                                                                                                |                                                                                                                                                                                                                                                                                     |                                                                                                                                                                                                                                                                                                                                                                                                                                                                                                                                                                                                                                                                                                                                                                                                                                       |  |

**e-Table 2: CT severity score: min 0 points – max 25 points.**

| CT severity score per lobe | Points |
|----------------------------|--------|
| 0%                         | 0      |
| 1-5%                       | 1      |
| 5-25%                      | 2      |
| 25-50%                     | 3      |
| 50-75%                     | 4      |
| >75%                       | 5      |

| <b>e-Table 3<br/>Patient Characteristics<br/>Excluded patients</b> | <b>Excluded<br/>patients<br/>N = 419</b> | <b>SARS-CoV-2<br/>PCR negative<br/>N = 326</b> | <b>SARS-CoV-2<br/>PCR positive<br/>N = 83</b> | <b>P value</b> |
|--------------------------------------------------------------------|------------------------------------------|------------------------------------------------|-----------------------------------------------|----------------|
| Age, mean (SD)                                                     | 55.6 (17.8)                              | 55.1 (17.9)                                    | 57.1 (16.3)                                   | 0.101          |
| Male, n (%)                                                        | 219 (52.3)                               | 170 (52.1)                                     | 46 (55.4)                                     | 0.194          |
| Admission, n (%)                                                   | 150 (35.8)                               | 103 (31.6)                                     | 45 (54.2)                                     | <b>0.001</b>   |
| Admission IC, n (%)                                                | 22 (5.3)                                 | 14 (4.3)                                       | 8 (9.6)                                       | <b>0.000</b>   |
| 30 days mortality, n (%)                                           | 30 (7.2)                                 | 21 (6.4)                                       | 9 (10.8)                                      | <b>0.039</b>   |
| In hospital Mortality, n (%)                                       | 23 (5.5)                                 | 15 (4.6)                                       | 8 (9.6)                                       | <b>0.000</b>   |
| Duration of symptoms, days (SD)                                    | 7 (9.4)                                  | 6.3 (7.3)                                      | 8.2 (7.4)                                     | 0.181          |
| <b>Co-morbidities, n (%)</b>                                       |                                          |                                                |                                               |                |
| Asthma                                                             | 48 (11.5)                                | 38 (11.7)                                      | 8 (9.6)                                       | 0.293          |
| Chronic Cardiovascular Disease                                     | 71 (16.9)                                | 57 (17.5)                                      | 12 (14.5)                                     | 0.178          |
| COPD (GOLD >2)                                                     | 57 (13.6)                                | 47 (14.4)                                      | 10 (12.0)                                     | 0.258          |
| Current Malignancy                                                 | 64 (15.3)                                | 61 (18.7)                                      | 3 (3.6)                                       | <b>0.000</b>   |
| Diabetes Mellitus                                                  | 55 (13.1)                                | 45 (13.8)                                      | 8 (9.6)                                       | <b>0.037</b>   |
| Hypertension                                                       | 105 (25.1)                               | 80 (24.5)                                      | 21 (25.3)                                     | 0.777          |
| <b>Observations at presentation</b>                                |                                          |                                                |                                               |                |
| Modified early warning score mean (SD)                             | 2.1 (1.6)                                | 2.1 (1.6)                                      | 2.2 (1.6)                                     | 0.957          |
| Temperature (Celsius), mean (SD)                                   | 37.7 (1.0)                               | 36.7 (1.0)                                     | 37.1(1.0)                                     | <b>0.000</b>   |
| Respiratory rate, mean (SD)                                        | 19.2 (5.9)                               | 18.8 (5.6)                                     | 20.7 (6.6)                                    | 0.091          |
| Saturation levels, mean (SD)                                       | 96.2 (4.6)                               | 96.2 (4.7)                                     | 95.7 (4.2)                                    | 0.912          |
| Oxygen therapy, n (%)                                              | 47 (11.2)                                | 28 (8.8)                                       | 19 (23.8)                                     | <b>0.000</b>   |
| Intubation, n (%)                                                  | 24 (5.7)                                 | 15 (4.6)                                       | 9 (10.8)                                      | <b>0.000</b>   |

**e-Table 4: Duration of symptoms**

| CT       | PCR +<br>Days, mean (SD) | PCR -<br>Days, mean (SD) |
|----------|--------------------------|--------------------------|
| CORADS 1 | 2.7 (1.9)                | 5.8 (8.9)                |
| CORADS 2 | 1.8 (1.0)                | 5.5 (6.7)                |
| CORADS 3 | 6.1 (6.5)                | 5.7 (9.0)                |
| CORADS 4 | 7.1 (4.6)                | 6.4 (5.6)                |
| CORADS 5 | 8.5 (4.4)                | 9.7 (5.7)                |

**e-Table 5: False positive diagnoses**

| Diagnoses                                            | N (%)    |
|------------------------------------------------------|----------|
| Bacterial pneumonia                                  | 7 (10.8) |
| Urosepsis                                            | 2 (3.1)  |
| Exacerbation COPD                                    | 2 (3.1)  |
| Malaise                                              | 2 (3.1)  |
| Organ failure in acute decompensated liver cirrhosis | 1 (1.5)  |
| Taxol pneumonitis                                    | 1 (1.5)  |
| Lymphoma                                             | 1 (1.5)  |
| Cellulitis                                           | 1 (1.5)  |
| Decompensated heart failure                          | 1 (1.5)  |
| Pericarditis                                         | 1 (1.5)  |

**e-Table 6: Alternative diagnoses**

| Alternative diagnoses                    | Percentage (%) |
|------------------------------------------|----------------|
| Bacterial/aspiration pneumonia           | 25             |
| Decompensated heart failure              | 12             |
| Exacerbation COPD/asthma                 | 10             |
| Malignancy progression                   | 8.5            |
| Upper respiratory tract infection        | 7.6            |
| Fever of unknown origin                  | 4.0            |
| Dyspnea of unknown origin                | 3.1            |
| Pulmonary embolism                       | 2.8            |
| Malaise                                  | 2.7            |
| Pericarditis                             | 2.2            |
| Sickle cell crisis                       | 2.0            |
| Neurological diseases**                  | 2.0            |
| Chronic cough                            | 1.8            |
| Gastrointestinal bleeding                | 1.3            |
| Abdominal & gastrointestinal infections* | 15             |

\*Group consisting of a broad array of diagnoses: UTI, splenic abscess, abscess after low anterior resection, gastritis, liver cirrhosis, cholangitis, cholecystitis

\*\*Group consisting of a broad array of diagnoses: epilepsy, CVA, intracranial bleeding



**e-Figure 5: CUSUM charts**

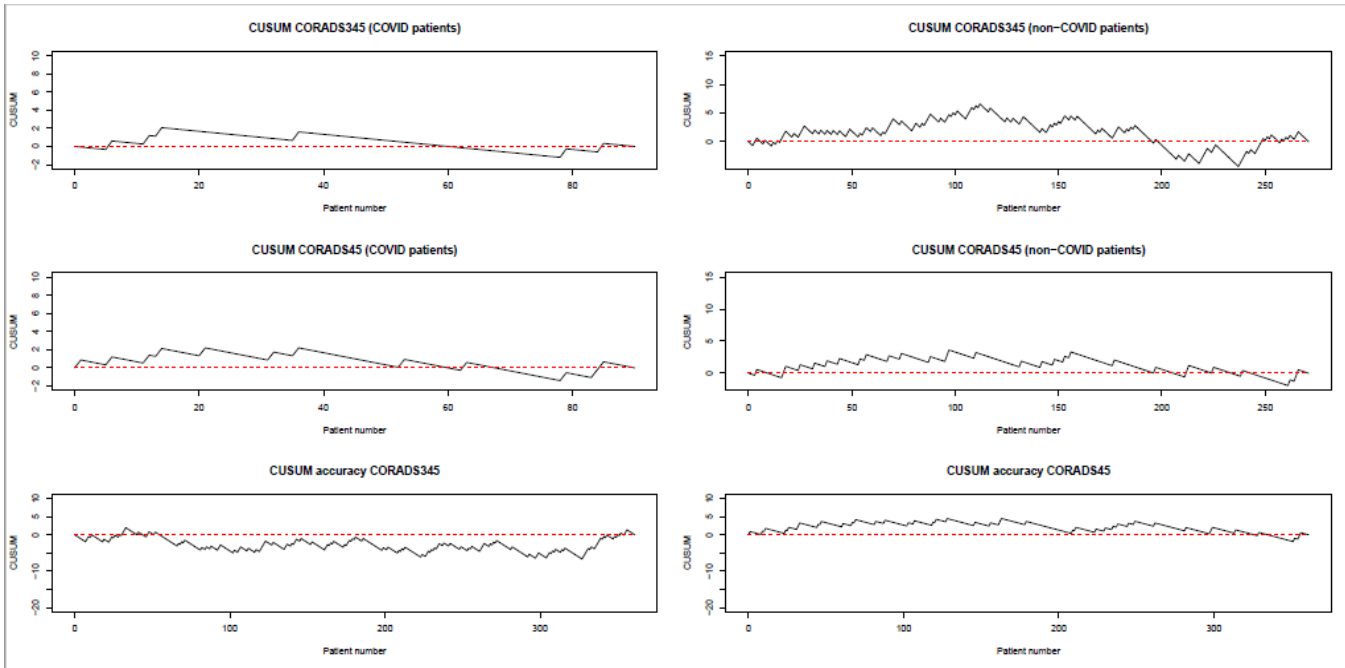

**Chart Center 1**

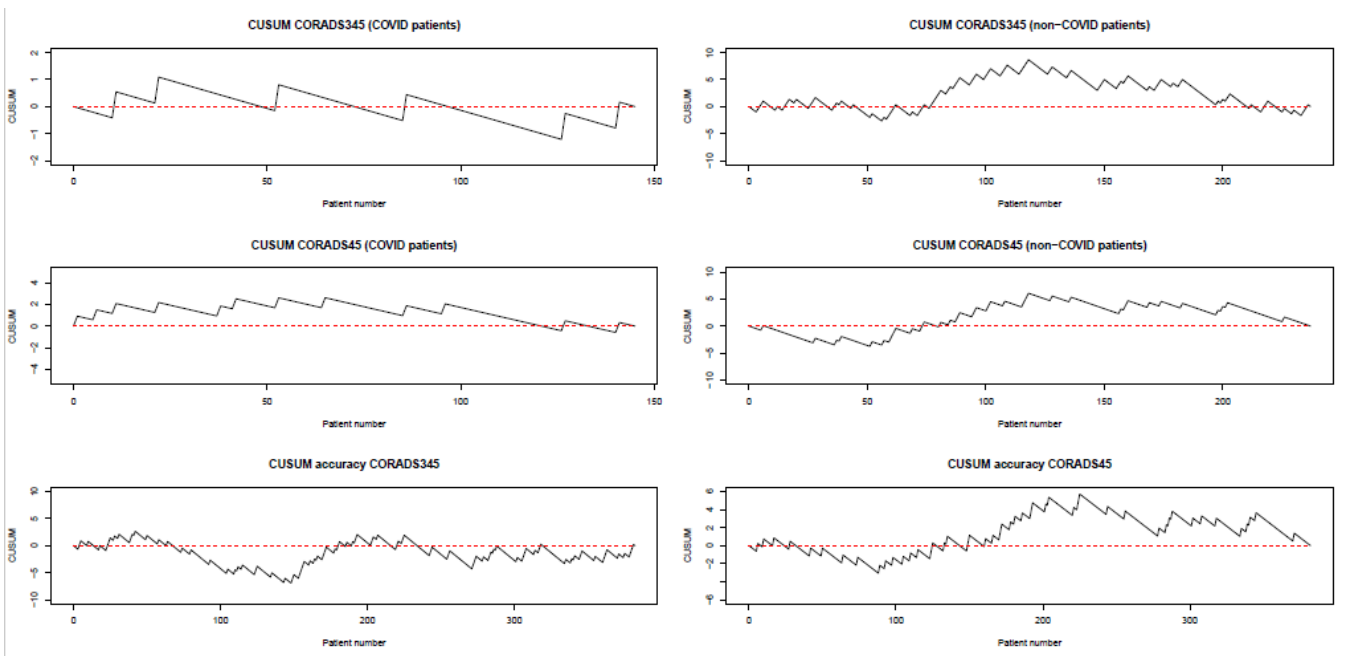

**Chart Center 2**

## **e-Appendix 1.**

### **e-Methods**

#### CT-scan

CT scans were performed without the use of intravenous contrast agents in supine position at the end-inspiration level. Four different CT systems were used: GE Discovery CT750 HD (GE Healthcare, Waukesha, WI, USA), Siemens SOMATOM Drive, Siemens SOMATOM Force and Siemens SOMATOM Definition AS+ (Siemens Healthcare, Erlangen, Germany). If necessary, pitch was increased to reduce motion artifacts. Multiplanar CT images are reconstructed with a slice thickness of 0.625 – 3mm.
